# Supplementary material
Source: Springer Nature journal article supplement (https://www.springermedizin.de/resource/supplementary/13049_2009_29_MOESM1_ESM.pdf/9665728)

**Central Nervous System**

↑ICP  
↓CPP

**Thoracoabdominal**

elevated diaphragm

↑ITP

IVC distortion

↓chest wall compliance

↓abdominal wall compliance

↓abdominal wall blood flow

**Hepatic**

↓portal blood flow

↓lactate clearance

**Gastrointestinal**

↓celiac blood flow

↓SMA blood flow

↓mucosal blood flow

↓pHi

↓APP

**Pulmonary**

↓compliance

↑PIP

↑Paw

↓PaO<sub>2</sub>

↑PaCO<sub>2</sub>

↑Qs/Qt

↑Vd/Vt

atelectasis

**Cardiovascular**

hypovolemia

↓CO

↓venous return

↓IVC blood flow

↑SVR

↑PVR

↑PAOP

↑CVP

**Renal**

↓renal blood flow

↓urinary output

↓GFR

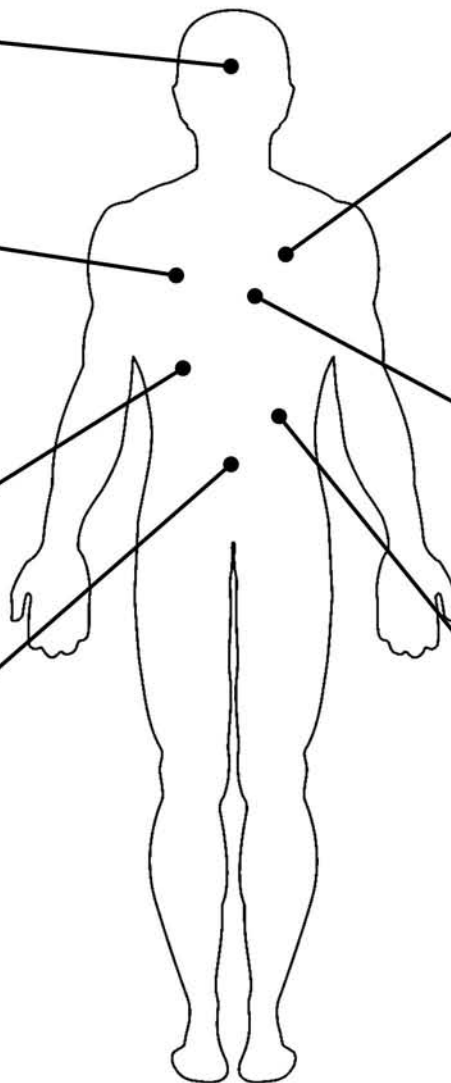

Supplement: MOESM1 [file 9665728]
